# Supplementary material
Source: PubMed Central journal article supplement (PMC3174628)
Supplement: 1107365108_pnas.201107365SI.pdf [file 1107365108_pnas.201107365SI.pdf]

# Supporting Information

Tsoar et al. 10.1073/pnas.1107365108

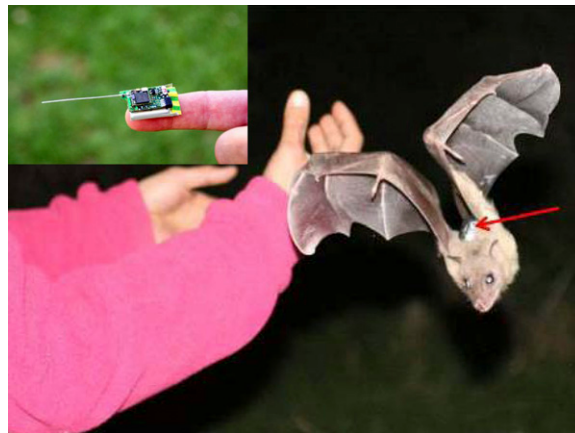

**Fig. S1.** GPS/radiotelemetry pack placed on the back of an Egyptian fruit bat (*R. aegyptiacus*). Photo taken at the moment of release. Photo credit: A. Tsoar. *Inset:* GPS datalogger without the radiotelemetry unit and the protective casing.

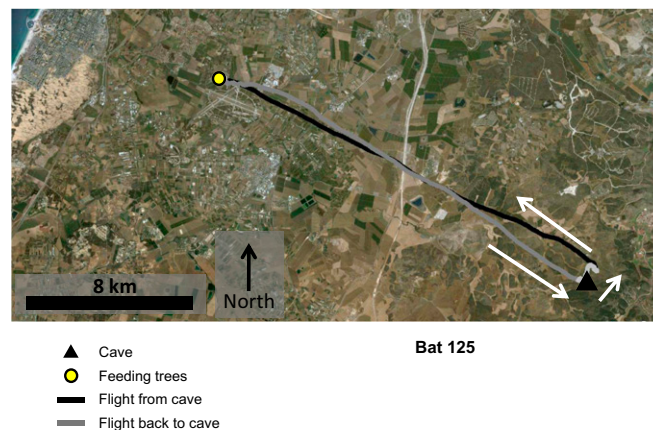

**Fig. S2.** Very straight commuting flights by the same bat shown in Fig. 1A (bat 125). The bat left the cave, flew locally (light gray line), then took a long commuting flight (black line) to the feeding trees and then commuted back to the cave (dark gray line). Superimposed on an aerial photo of the area, taken from Google Earth.

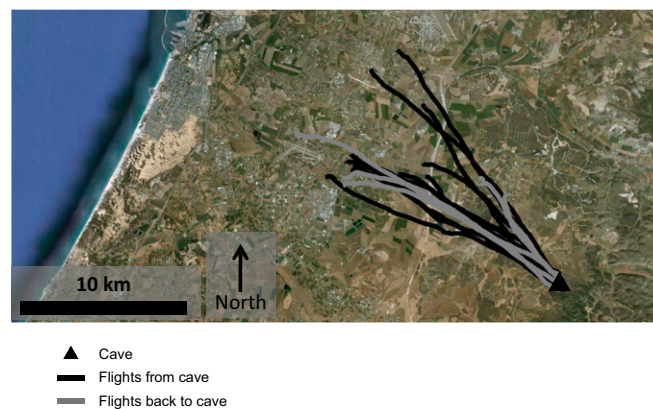

**Fig. S3.** Population data shows commuting flights that started or ended directly at the cave. Colors represent the long commuting flight to the feeding tree (black) or back to the cave (dark gray). Superimposed on an aerial photo of the area, taken from Google Earth. Same data as in Fig. 1C. Note the very straight commuting flights from the cave and back to the cave.

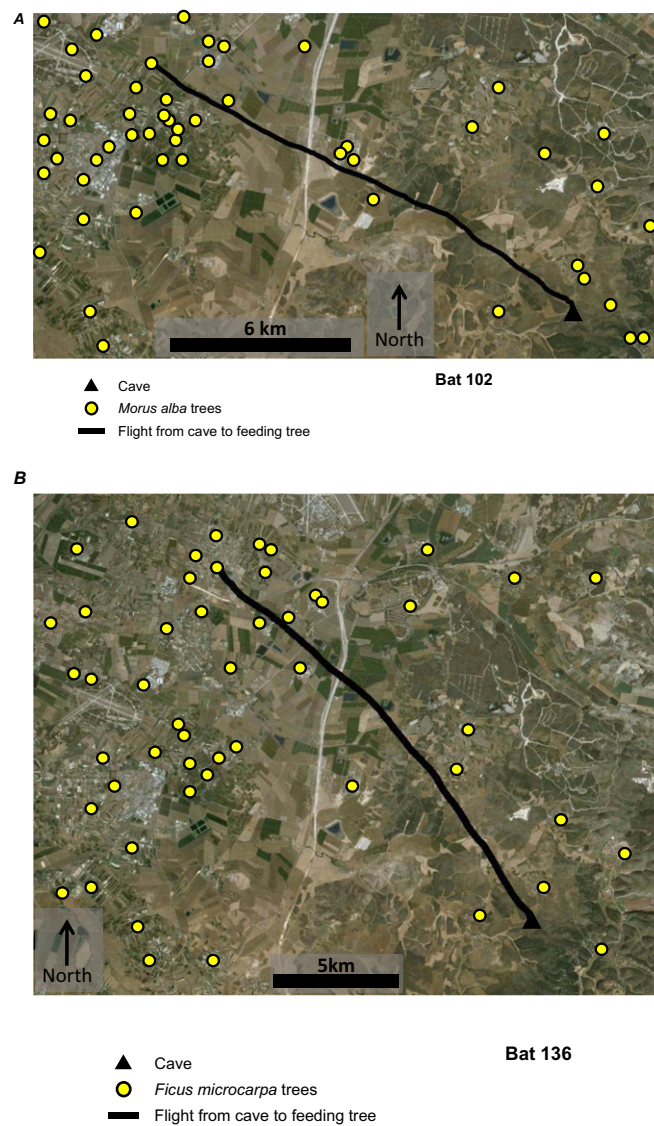

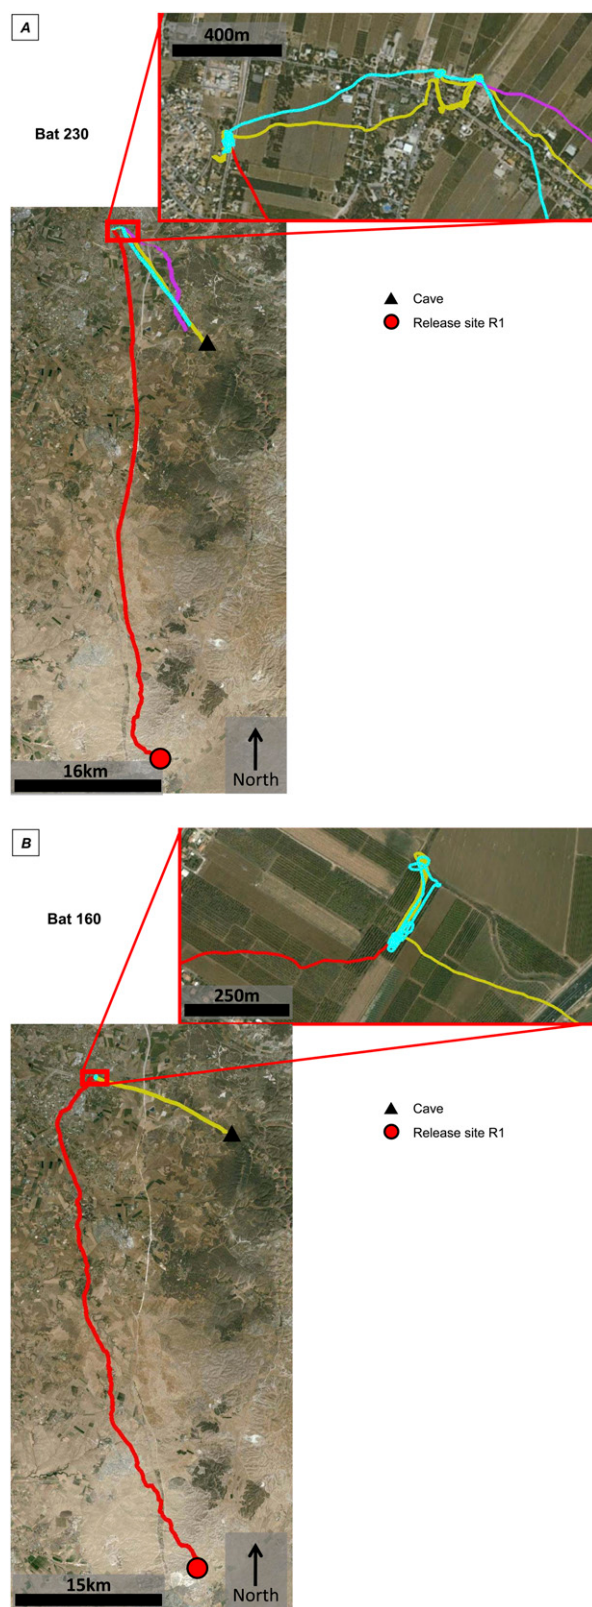

**Fig. S5.** Bats released at site R1 early in the night and not fed by the experimenters flew to feed at a favored tree, and then returned to the same individual tree night after night. Shown is a close-up of the foraging of a translocated bat returning to the same foraging tree on three consecutive nights (A, bat 230; B, bat 160). These are the same bats as in Fig. 2 C and D. Superimposed on an aerial photo of the area from Google Earth; different colors represent different consecutive nights.

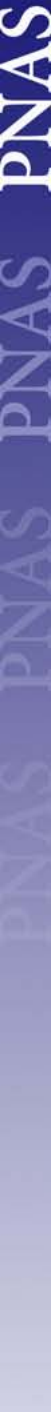

1. Shirman B (2000) Three component magnetic anomaly maps of Israel. *Isr J Earth Sci* 49:1–7.

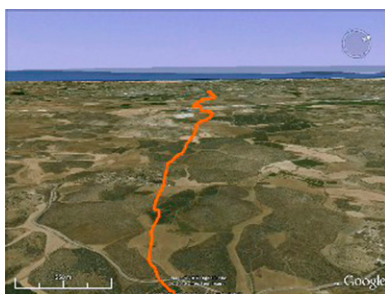

Movie S1
